# Supplementary material for: Cross-talk of four types of RNA modification writers defines tumor microenvironment and pharmacogenomic landscape in colorectal cancer
Source: Springer Nature journal article supplement (doi:10.1186/s12943-021-01322-w), 2021-02-08

Figure S1

A

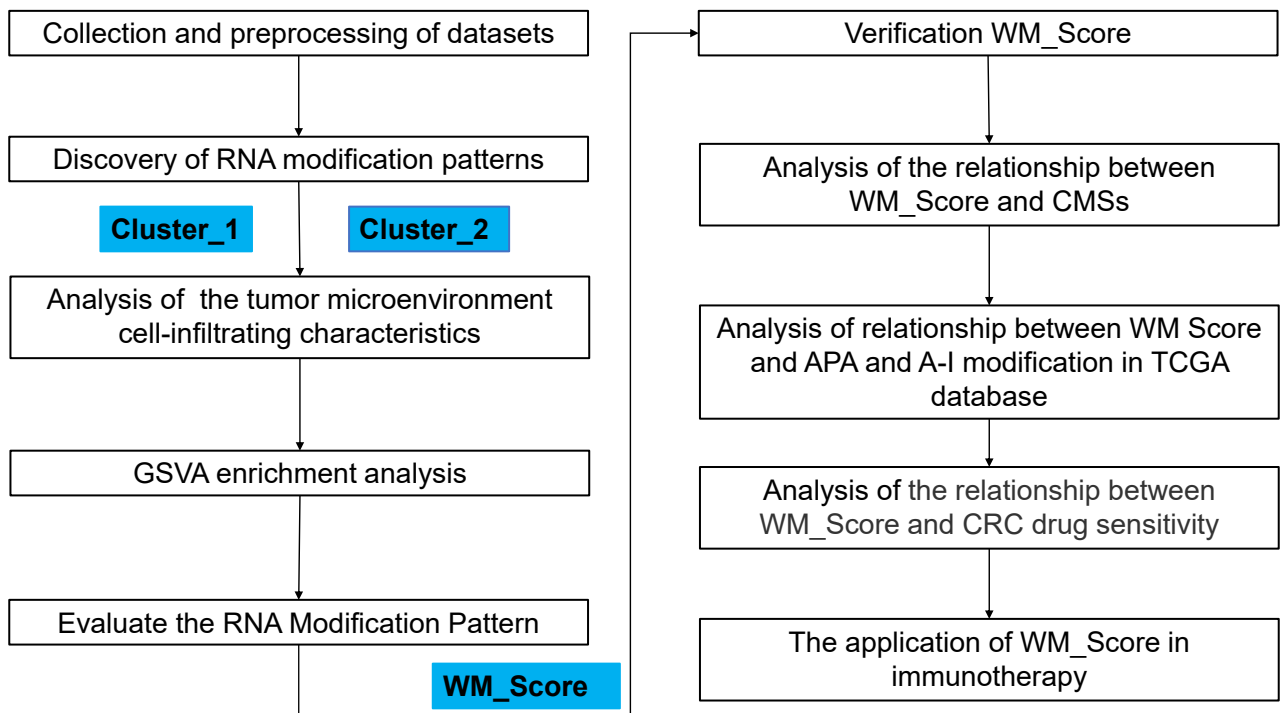

Figure S2

A

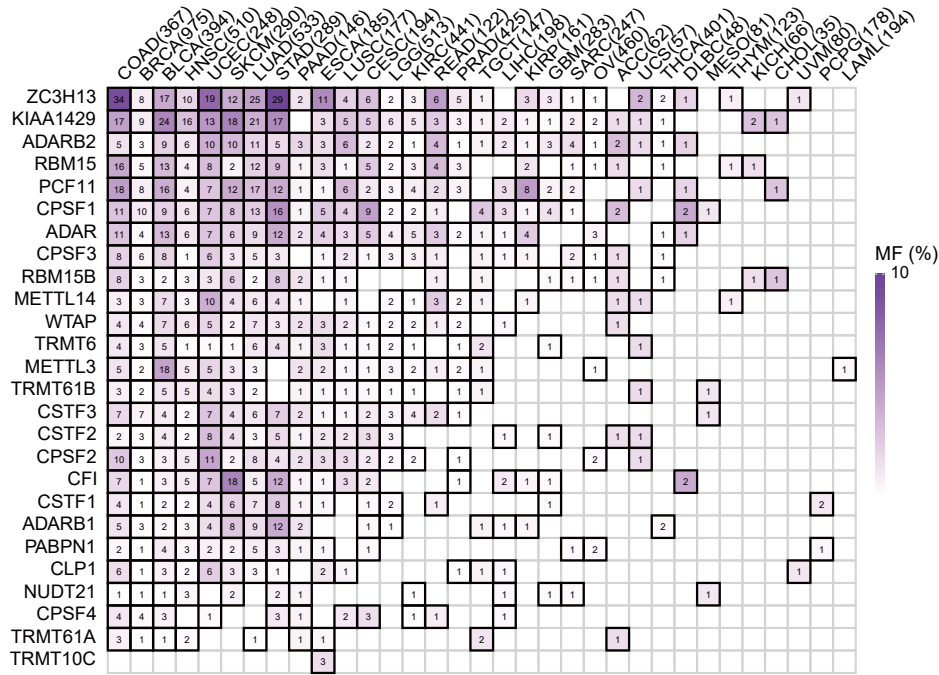

B

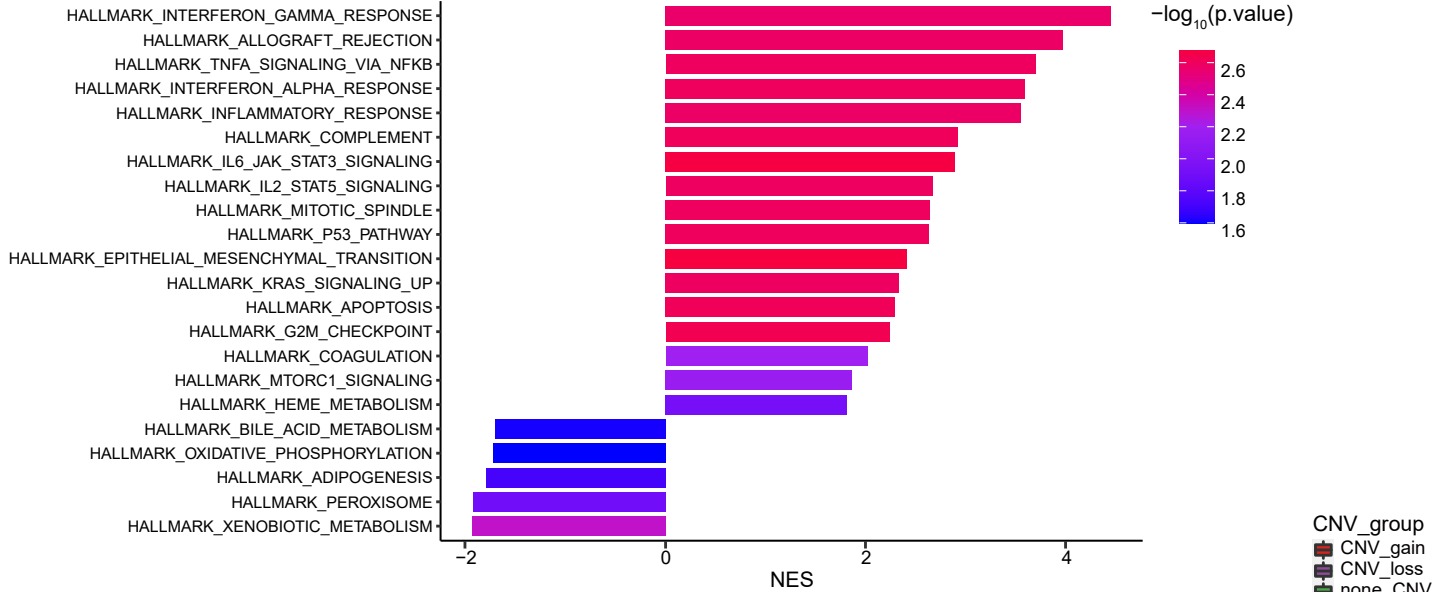

C

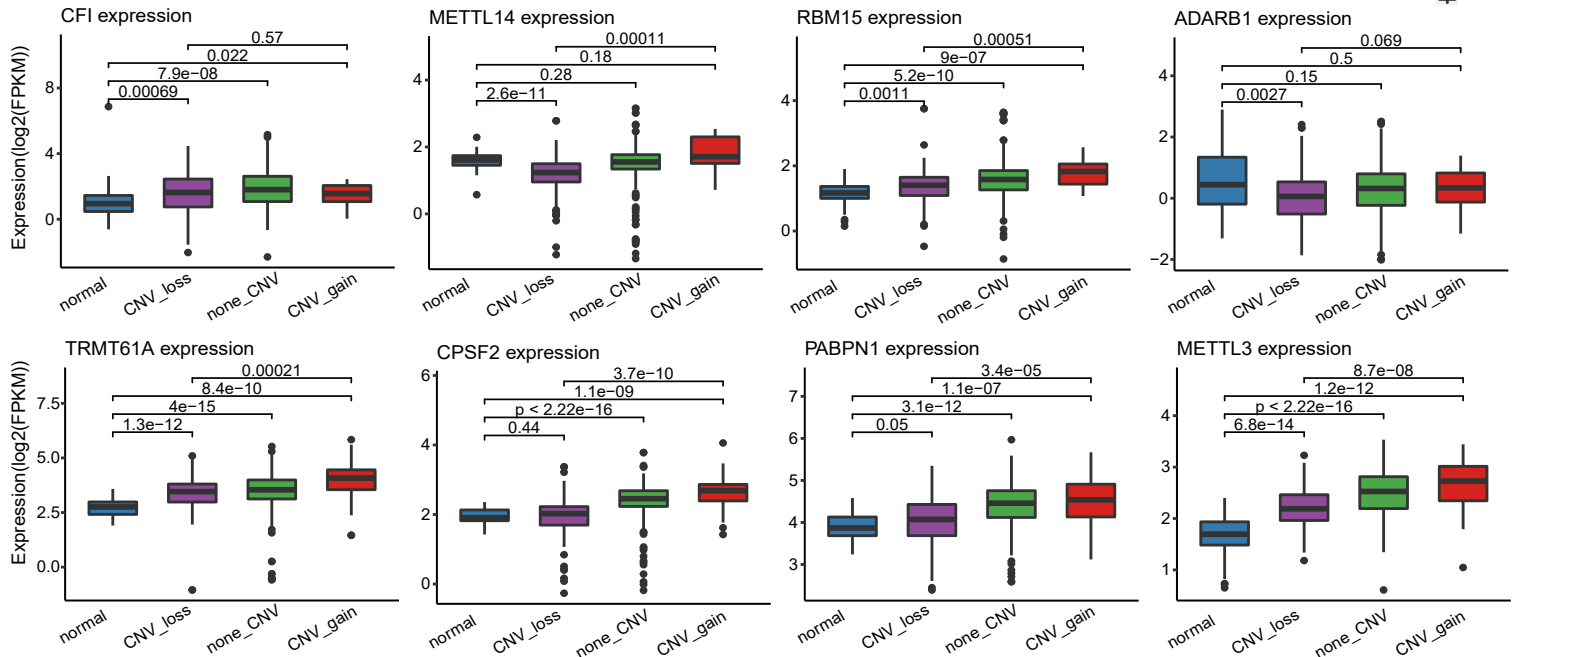

Figure S3

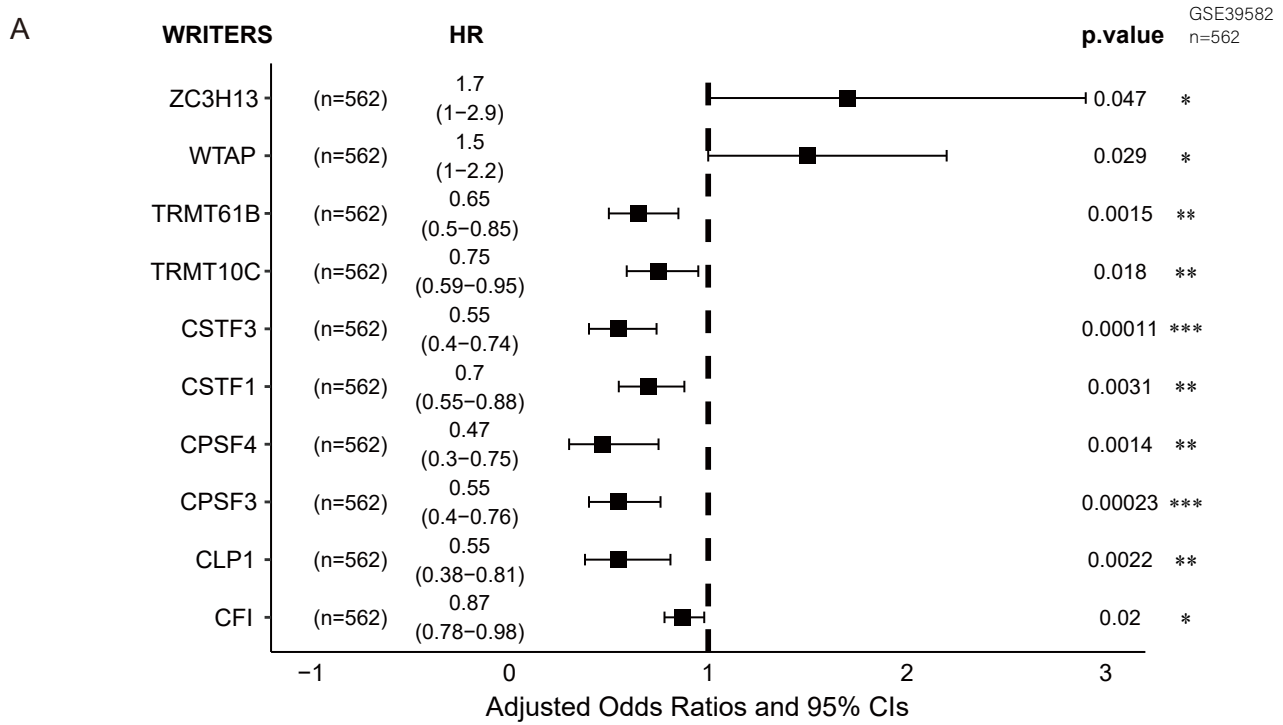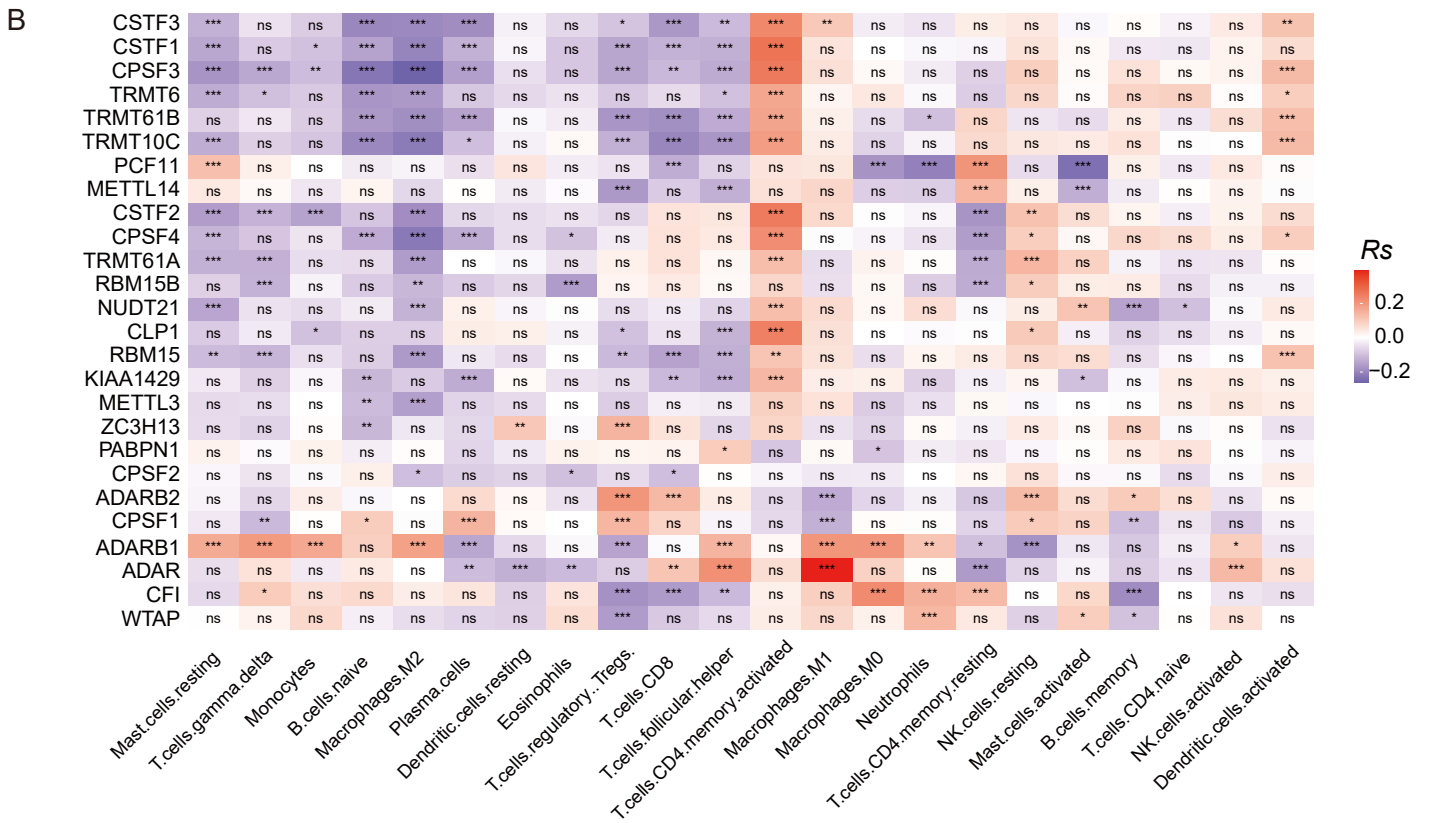

Figure S4

A

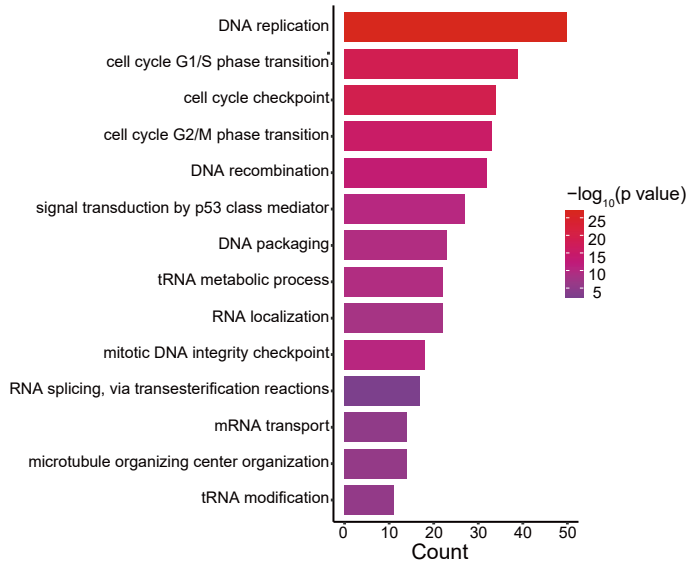

B

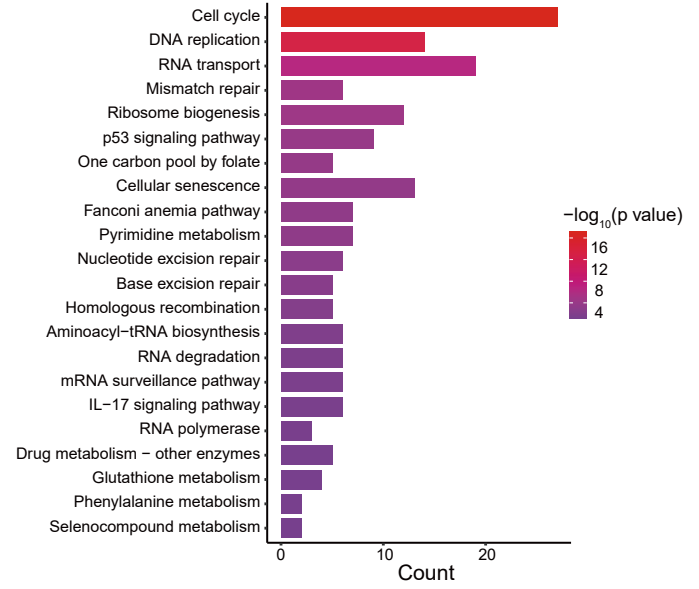

C

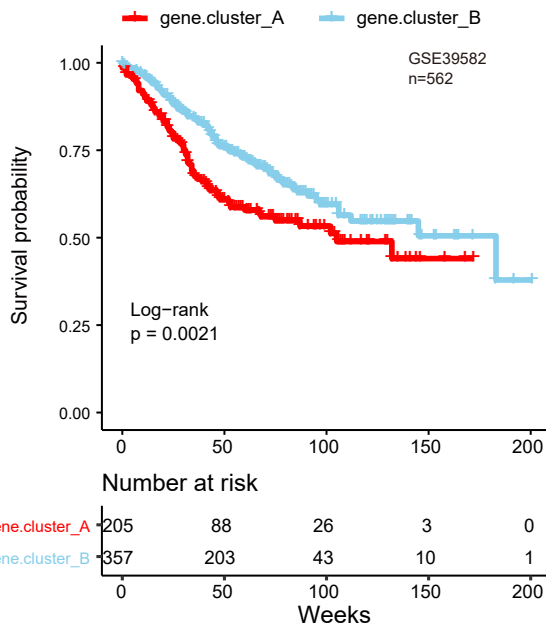

D

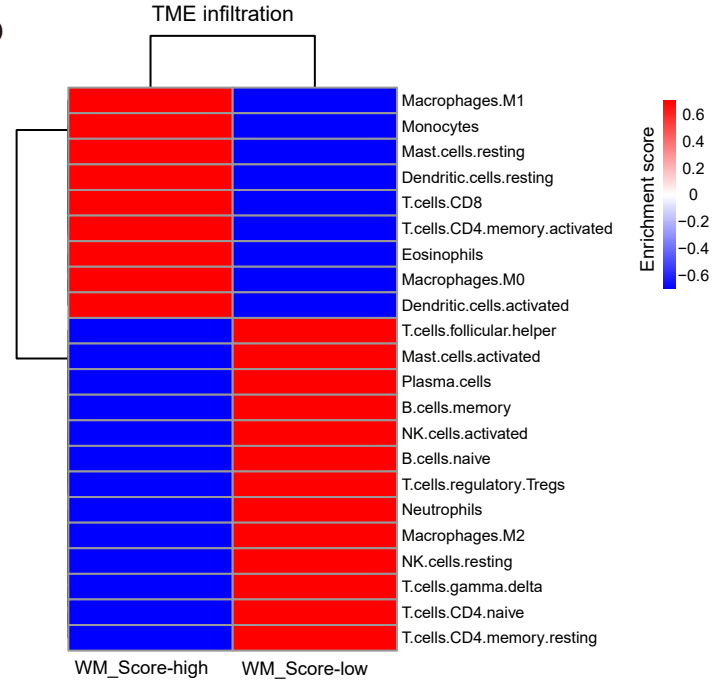

E

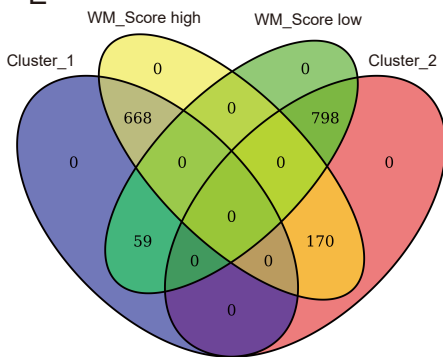

F

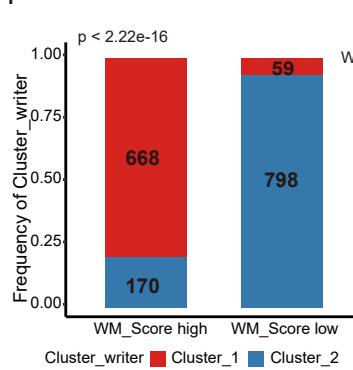

G

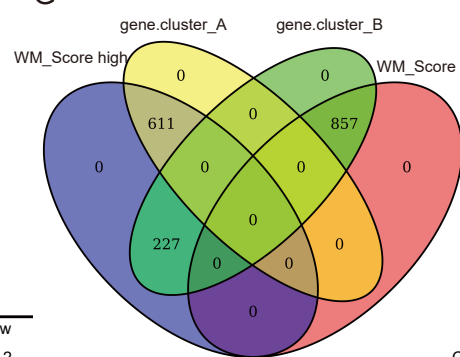

H

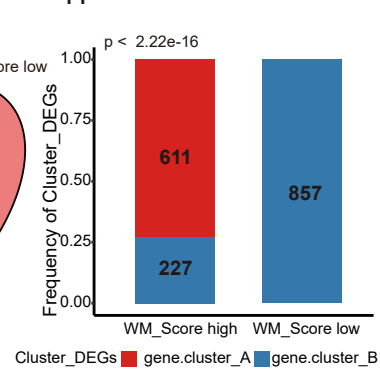



Figure S5

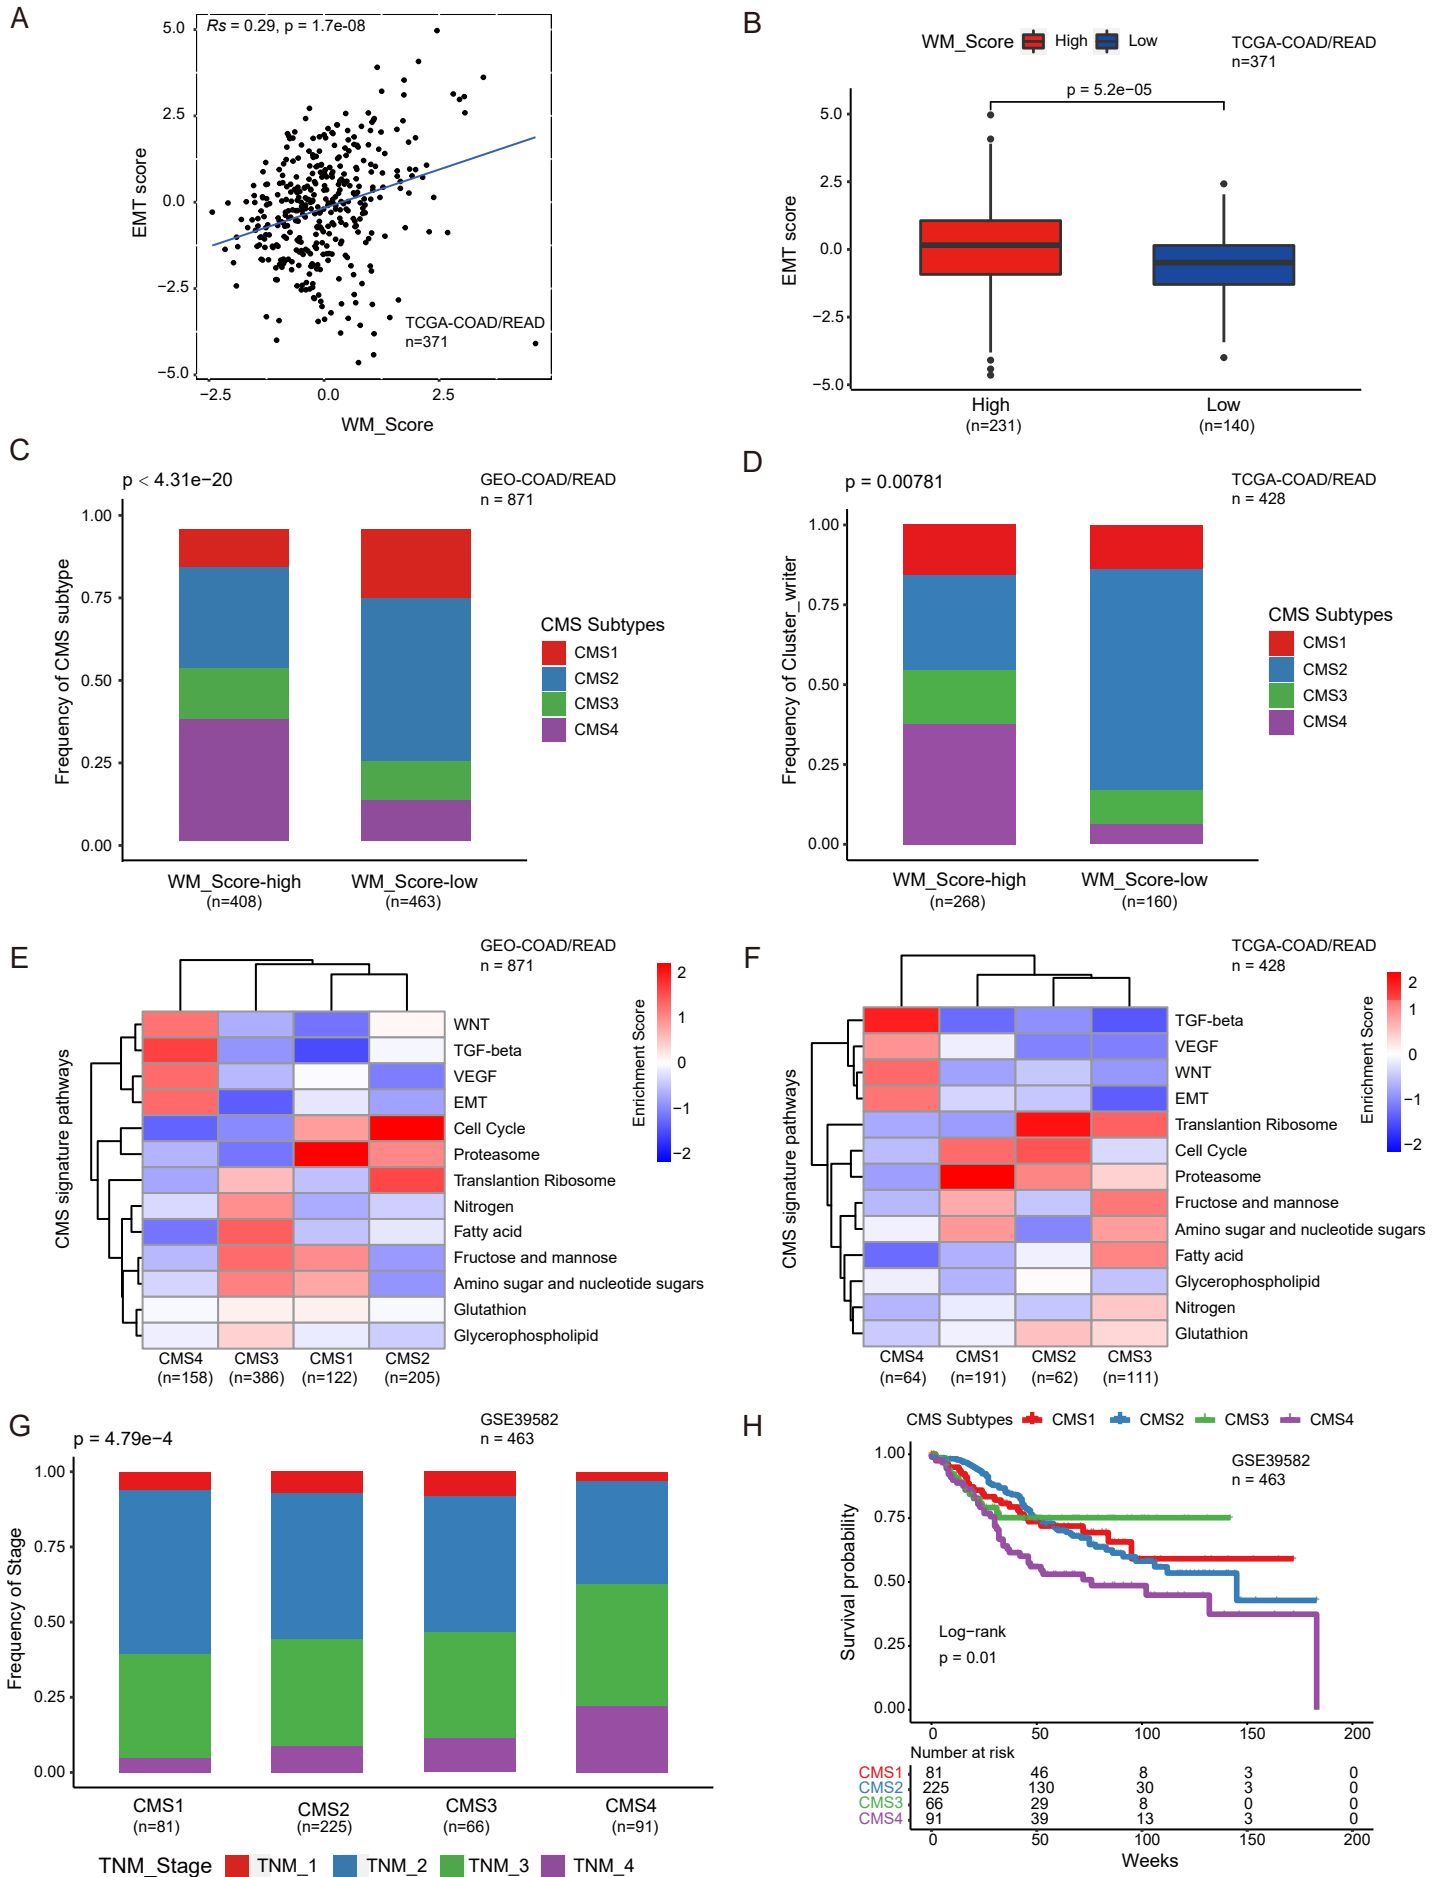

Figure S6

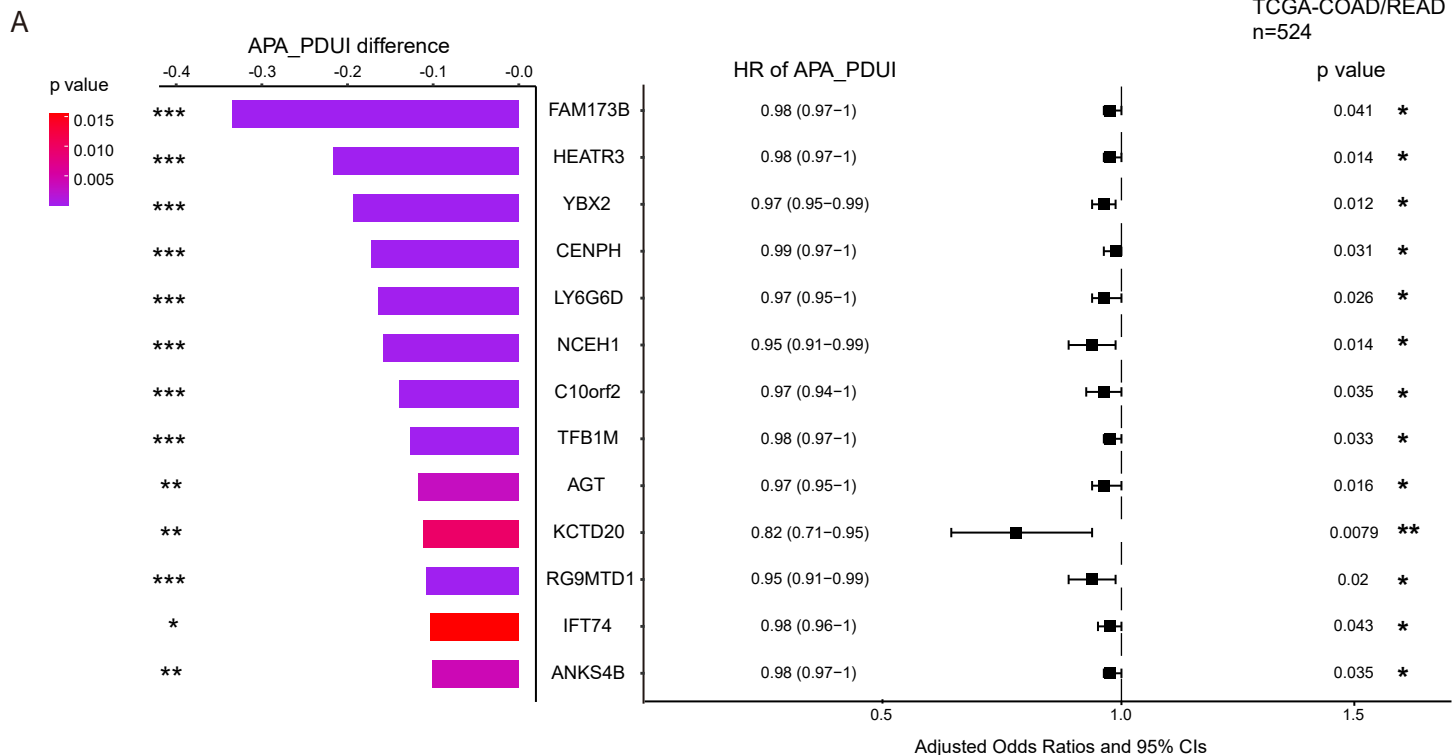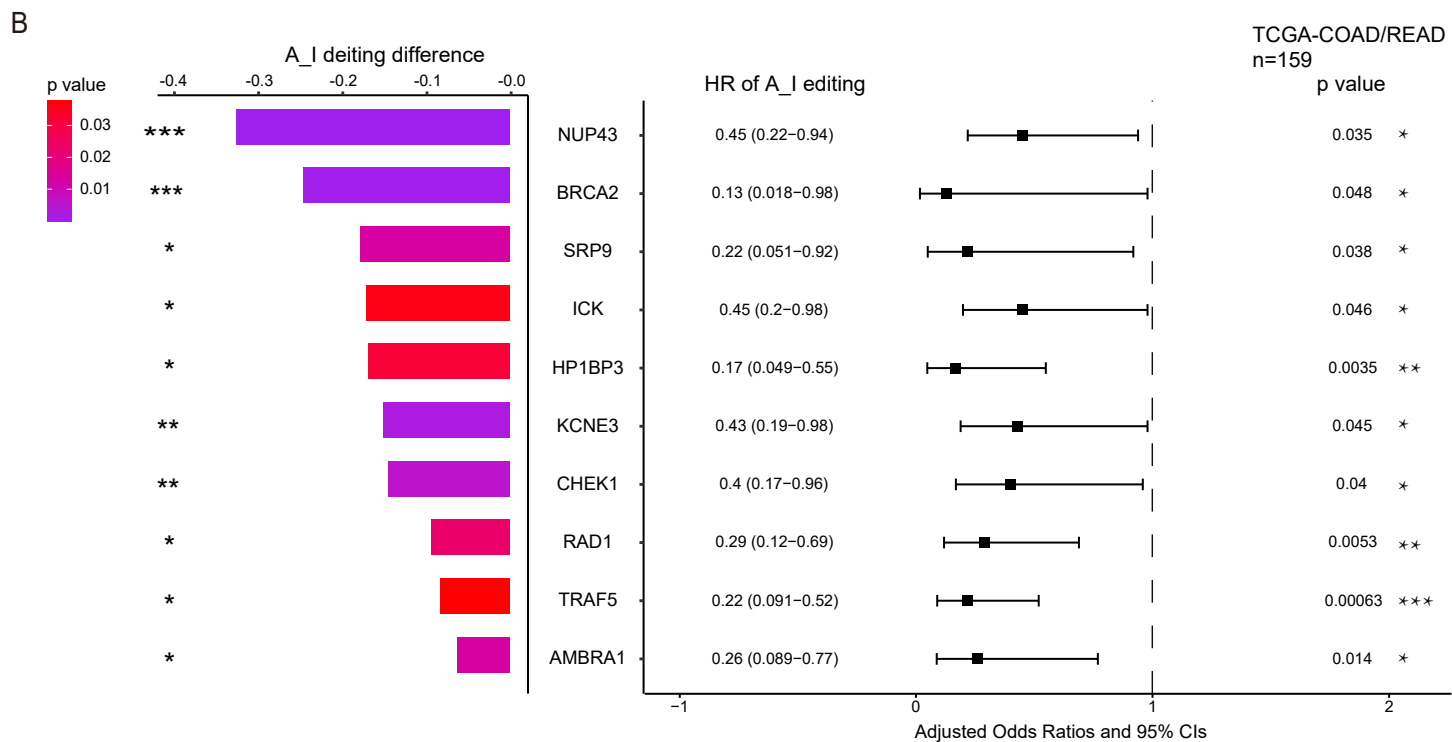

Figure S7

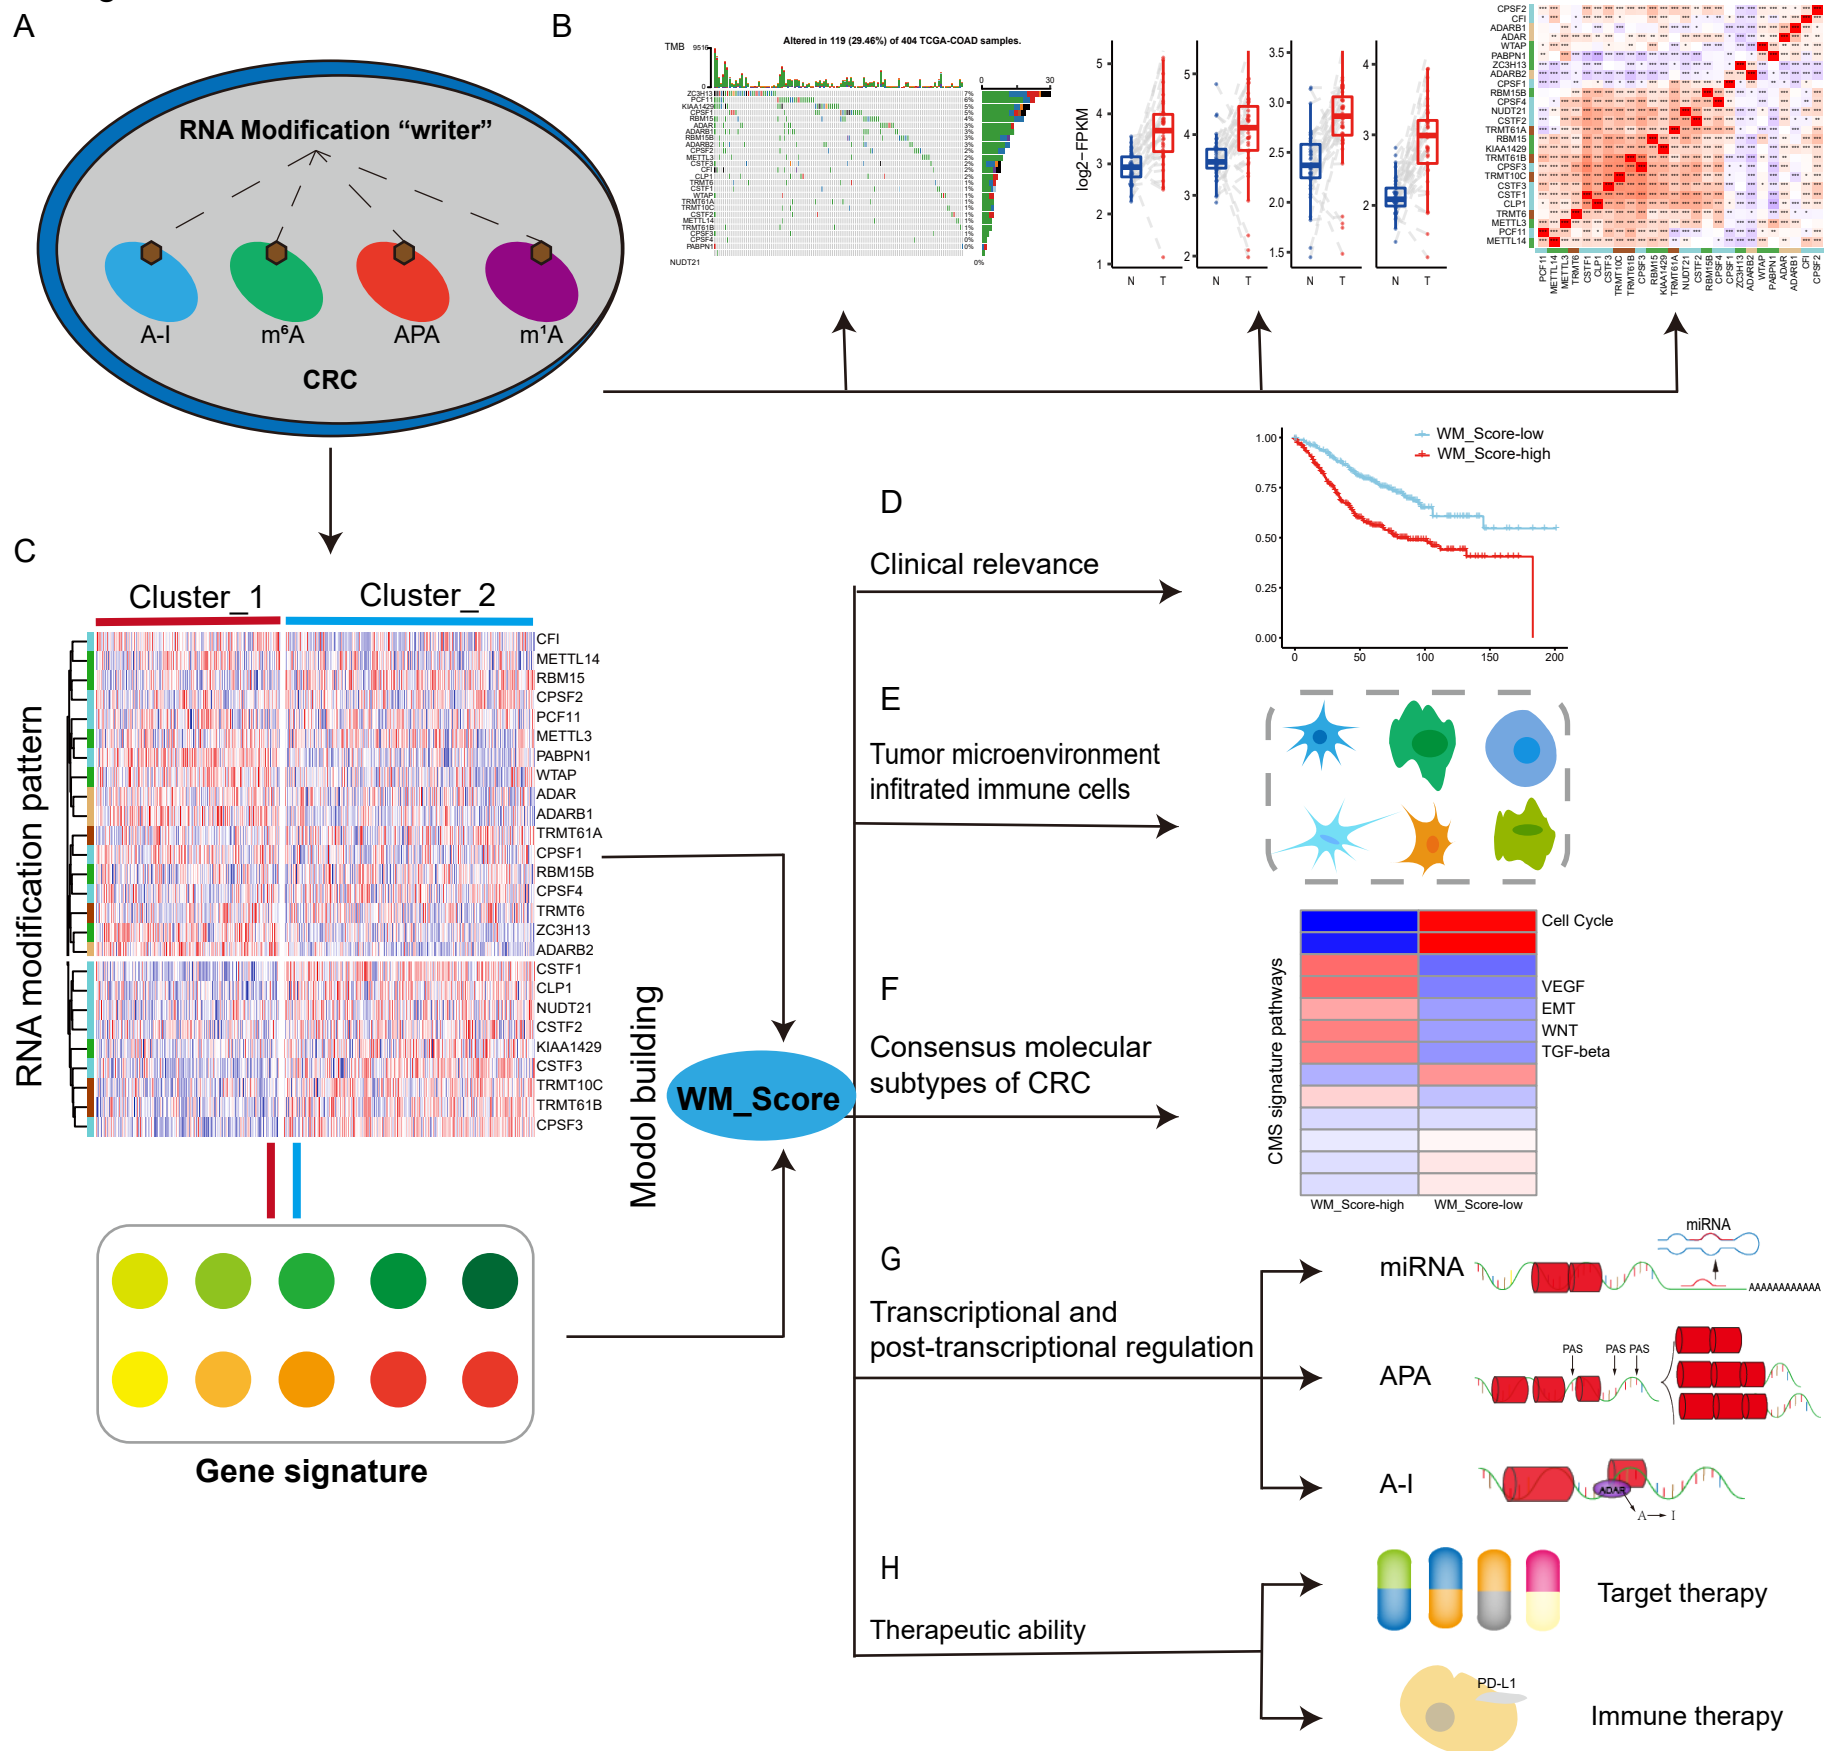

Supplement: MOESM1 [file 18842216]
